# Supplementary material for: Novel Conjugative Transferable Multiple Drug Resistance Plasmid pAQU1 from Photobacterium damselae subsp. damselae Isolated from Marine Aquaculture Environment
Source: PubMed Central journal article supplement (PMC4036041; doi:10.1264/jsme2.me11338), 2012-03-23
Supplement: 27_263_s1.pdf [file 27_263_s1.pdf]

**Figure legends for a supplemental figure**

**Figure S1.** Alignment of amino acid sequences from the 25 relaxases (TraI) in plasmids and SXT/R39 that belong to the MOB<sub>H</sub> family. The amino acids sequences of the highly conserved regions (boxed) were aligned.

```

=====
10      20      30      40      50      60      70      80      90      100     110     120     130     140     150     160     170     180
R27_IncH1  --MNFRALFLSMQVRFGLFSRRENDVSELMKMDAANFSPAQIIGEQKYTVDPDHPNPEVLKFIETPRRPAIGIQTNE-----CSILSYRDLKHSISMMLAISDGIREDATFTFTNLVLKPLIEYIRWIHLLPASENHHHNGIGGLLSHSLE
R478_IncH12  --MMNFRALYLCIKRILGIFSSQENDATSMVIDISSLSPAQILGDQKYTVDPDHPNPEVLKFIETPRRPAIGIQTNE-----CSILSYRDLKHSISMMLAISDGIREDATFTFTNLVLKPLVEYVRWIHLLPASENHHHNGIGGLLSHSLE
R391_IncJ_   --MFKNLFQTKALPELSSQL-----DADIP-----RYPPFLKGLPASP-----EDLQSQDQELIACLKRVLGFNQRI-----DFQRLIQPCIDHLAAYVHLLPASEHHHHSAGGLLRHSLE
SXT         --MFKNLFQAKALPELSSQL-----DAEIP-----RYPPFLKGLPASP-----EDLQSQDQELIACLKRVLGFNQRI-----DFQRLIQPCIDHLAAYVHLLPASEHHHHSAGGLLRHSLE
pAsa4      --MFGWGGKSGESPOSGRLLPLKMD-----EEDIP-----RIPFFAKGLVPAPI-----DKILATQAEILIEKVRNSLGFTE-----DFNRLVLPVIHRYAAFVHLLPASEAHHHRGAGGLFRHGLE
p1P1202_IncA/C  --MLKALNKIPGGRSGVIETAPASRVLPVKDVE-----DEEIP-----RIPFFAKGLVPAPL-----DKILATQAEILIEKVRNSLGFTE-----DFNRLVLPVIQRYAAFVHLLPASESHHHRGAGGLFRHGLE
pAQU1     --MISSAFKKLPGGRGKKEVVAS-----QVRDLA-----RIPFFAKGLPMAVP-----EYDRLVMPVIGRYAAFVHLLPASEAHHHRGAGGLFRHGLE
PAGI-2_C   -----MLSLFQQRKRPVATATPTPPASDLPKGLM-----REPESAASILLATPRRQKLEHIEWO-----FTSLSRIFOPAVLYRAPLERYAELVQVFPASESHHHAYPGGMIDHGLE
c1c       --MLSLFQQRKRPVVASATPPASNDLPKRL-----REPESAASILLATPRRQKLEHIEWO-----FTSLSRIFOPATLYRAPLERYAELVQVFPASEAHHAYPGGMIDHGLE
PAGI-3_SG  -----MLSLLQQRKRVSPTAGPATPASDSPKRLT-----REPESATALLPRRQKLEHIEWO-----FTSLSRIFOPATLYLAPLERYASLVQVFPASESHHHAYSGGMIDHGLE
PAGI-4_C   -----MELLGTIPRRRQLLENLWOCASLSKQOFEIYRRPLANYAELVQVLPASENHHHHAHPGGMIDHGLE
pKLC102   --MFQLLSWISRKPSPTPTTKAAPGVFL-----LPLSSTALLDTPRRRQLLENLWOCASLSKQOFEIYRRPLANYAELVQVLPASENHHHHAHPGGMIDHGLE
Plasmid2_Ralme_  -----MSTHT-----SMPMAEALLSREASRIALRQYAEVS-----GILLFAVKWLSILTRCADWFSSMLRFAEHAH-----PGGAFRATVE
pMOL28    -----MTH-----HHLTPAALLASHDSRLALRVQYANESD-----DGFRTKWLSVLDRCAAWFSSMPLRPTAEHAH-----PGGAFRATVE
pHG1      -----MHDH-----ELVSRNERIELIAQCANESSR-----EFDRKMWVLIRRCAEWFSSVPPGPDLYRE-----PGSAFRATVE
pBVEI02   -----MFRRLMKRLETSSPEKPTPYA-----VALSGDKLLQPKRTELISRVKRFVSTVEVWNKHLYLAIQFAELVQVFPASEIIHHHSGGLLDHTE
pMAQU02   --MFNRLKTLFSGKRTPKPTVNOIIMPAEV-----VEALTGSGDILRYPPEALGFPVAVG-----EYDEYIQPMLTNFANFVHLLPASEFHHHRAGGLLRHTE
Rts1_IncT  --MFNRLKTLFSGKRTPKPTVNOIIMPAEV-----VEALTGSGDILRYPPEALGFPVAVG-----EYDEYIQPMLTNFANFVHLLPASEFHHHRAGGLLRHTE
pCAR1_IncP7  MRRSKSRHSFSEPSGNSPARHLPGFFSTKILPENETQGGIIPHASFAHMAEKRMPPFSFLKRLMRSERALDZFAHPAEQMTITEIKRYLENHNNWNLRLVPPYQEGYPLVLSVQDFMKNYQHELFRDIILHISVGMGAPDLKLVPELIVNFAELNHLPLASENHHHSGGGLLRHSLE
Plasmid1_Rhofe  --MRFSDVFSFIKRTPKRVIIPVSSVRVGTIIPAMVO-----VVAPESNEPGVRYPPRPMDSGIRLPT-----DQVLTAVQDMLLRLKRNLIAND-----DFERRYLALPRLRAEILNLIIPATRKDHHAGGGLFRHAAT
Plasmid2_Polsp  -----MSIFNI FTRKAAAPLAIPEQRTALANSS-----RWQASKASLEAIIYPLDPLPVIDA-----EQLLHGAEAKLKRIVEIAGGTAS-----EFERLYMTPIRLLASHVHLLPATSSSHSYSGPGLFNMSLD
Plasmid1_Polsp  -----MKTSLLTIIASSLMVSGSMLYLIN-----TRKSTDVSHNDEVAHINQNIWNRFR-----ILMAHELIQVLDLSPQISGKMYMLGLSDNMSKDALPYLEKYIAFVQRLPASESHHHAHPGGMIDHVRTLD
chrom_Neigo_  -----MKTSLLTIIASSLMVSGSMLYLIN-----TRKSTDVSHNDEVAHINQNIWNRFR-----ILMAHELIQVLDLSPQISGKMYMLGLSDNMSKDALPYLEKYIAFVQRLPASESHHHAHPGGMIDHVRTLD
pNPAP01    -----MKTSAKHPKYLFSEMHGDYFAQLLTICVGEHAFRSYQIYPAERLACTVQDPLEN-----SFFAYAGGALQGLLL
Plasmid1_Shesp_  -----MKKIAKLVSLAVRSFLLDGKTPDKNAVRFMFGG-----IETKAVSEELAEETFPVADGVAVNQARIKKS-----NNDLIDMSIRELGLTDIHRDTFNPANLFEYNQVINAQTLVRDVRVANFLSYAHLPLASENHHHAAVGLLARHSLE
=====

```

```

=====
190     200     210     220     230     240     250     260     270     280     290     300     310     320     330     340     350     360
R27_IncH1  VAMISLKNANHSELRRPIGYQDEEVVRRKVLYAAFCIGLVHDAGKVYDL-DIVSLNLS-----EPLTWAPSSQSLLDWAR-----NNNVVEYIHHWRKRI-----ANQHNWSSVFLERILDPVCMFLDRVVKERVYAKMVTALNV-----MAGNDFLSKCVRTSDYYSTGTGDLNV
R478_IncH12  VAILSLKNAHHSLELRPIGYQDEEVVRRKVLYAAFCIGLVHDAGKVYDL-DIVSLNLS-----SPIIWTWPPSSQSLLDWAR-----NDVVEYIHHWRKRI-----ANQHNWSSVFLERILNVPCLAFLDVRNKEVYKSMITALNV-----TGNDFLSKCVRTADFYSTGTGDLNV
R391_IncJ_   VAFWAAQAAEGII FVASGTPVEKKELEPRWRVAAALGGLFHDIGKPVS-----DLSITDED-----GRYQWNPFLLETLSQWITNNSIERYFIWRWDGR-----CKRHEQFSLVLRNVRMPELLAIAWLTQPGFE-----ILQAMLEAIGN-----TDLEHVLSKLVLEADQTSVQRDLKA
SXT         VAFWAAQAAEGII FVASGTPVEKKELEPRWRVAAALGGLFHDIGKPVS-----DLSITDED-----GRYQWNPFLLETLSQWITNNSIERYFIWRWDGR-----CKRHEQFSLVLRNVRMPELLAIAWLTQPGFE-----ILQAMLEAIGN-----TDPEHVLSKLVLEADQTSVQRDLKA
pAsa4      VAFWAAQASESVI FSI EGT PKQRDNE PRWRLASCFSGLLHDVKGPLA-----DVSITDKN-----GVVWNPNYFESLHDWAGRNHVDRYFIWRWREKR-----KRRHEQFSLAVDRI I PVATREYLSSESGE-----IIEAMLEAISG-----TVNQPVTKMLLRADQESVSRDLQK
p1P1202_IncA/C  VAFWAAQASESVI FSI EGT PRERDNE PRWRLASCFSGLLHDVKGPLS-----DVSITDKD-----GSIITWNPYSELHDWAHHEIDRYFIWRWRDR-----KRRHEQFSLAVDRI I PAETREFLSKSGES-----IIEAMLEAISG-----TVNQPVTKMLLRADQESVSRDLQK
pAQU1     VAFWAAQASESVI FSI EGT PRERDNE PRWRLASCFSGLLHDVKGPLS-----DVSITDKD-----GSKTWNPNYSETLVDWAKRNHVSRYFIWRWRDR-----KRRHEQFSLTVERILITPEALELADPDKG-----IIEAMLEAISG-----LRINDPVTKMLLRADQESVSRDLQK
PAGI-2_C   IVAYALKRQSHLLPI GASPEEDQAQAEMWTAAYAAVAAALLHDIGKIVAV-----DLHVELA-----DGSGLWHFWYGLPHQYR-----FRYRDDRE-----YRLHSAATGLLYRQLLDTQDLWLSGYRDL-----WGPLLYVLAGQ-----YHAGTIGELVVQADRASVAQELGG
c1c       IVAYALKRQSHLLPAGSTPEDQAQAQSEAMTAAYAAVAAALLHDIGKIVAV-----DLHVELA-----DGSGLWHFWYGLPHQYR-----FRYRDDRE-----YRLHSAATGLLYRQLLDTQDLWLSGYRDL-----WGPLLYVLAGQ-----YHAGTIGELVVQADRASVAQELGG
PAGI-3_SG  IVAYALKRQSHLLPTGTPEQVIOQAEAMTAAIYAAALLHDIGKIVAV-----DLHVEYG-----DGSGLWHFWYGLPHQYR-----FRYRDDRE-----YRLHSAATGLLYRQVLDLRLDLSRYPPL-----WGPLLYVLAGQ-----YHAGTIGELVVQADRASVAQELGG
PAGI-4_C   IVAYALKVRQTYLLPI GAAPESQSAQEAEMSAAYAAVAAALLHDIGKIVAV-----DLQVELQ-----DGSGLWHFWYGLPHQYR-----FRYRDDRE-----YRLHSAATGLLYRQVLDLRLDLSRYPPL-----WGPLLYVLAGQ-----YHAGTIGELVVQADRASVAQELGG
pKLC102   IVAYALKVRQTYLLPI GAAPESQSAQEAEMSAAYAAVAAALLHDIGKIVAV-----DLQVELQ-----DGSGLWHFWYGLPHQYR-----FRYRDDRE-----YRLHSAATGLLYRQVLDLRLDLSRYPPL-----WGPLLYVLAGQ-----YHAGTIGELVVQADRASVAQELGG
Plasmid2_Ralme_  AAYFAMRLSQAQKFGADQPSERRRMLPEQYLYALFLAACCSRLEDPCR-----HFQFYRDS-----DGAEWI PAAHGAFG-----PWGTSN-----YRVTRREAIQPIERMRTALLAR-----EILGSRERLAFDQSVLTLFQ
pMOL28    AAYFAMRLSQAQKFGADQPSERRRMLPEQYLYALFLAACCSRLEDPCR-----HFQFYRDS-----DGAEWI PAAHGAFG-----PWGTSN-----YRVTRREAIQPIERMRTALLAR-----EILGSRERLAFDQSVLTLFQ
pHG1      AAYFAMRLSQAQKFGADQPSERRRMLPEQYLYALFLAACCSRLEDPCR-----HFQFHRMR-----DGAEWVPAAHGAFG-----AWLGDST-----YRVTRREAIQPIERMRTALLAR-----EILGTRERLAFDQSVLTLFQ
pBVEI02   TAFYAVRISAGGLKTNLTSERRRIEPOYNFVFLAAICSGLDEPYR-----HFDEVRAT-----DQCVWNPVSWHGVAG-----PWLAGTS-----YCVARRATLPLVERMTRGLMAH-----ALVGTCELLSGLDVAQEAIFG
pMAQU02   IALYAGVRI SGGYILPNNAEPESIAESADRWFPAAMIAALLSHDIGKIVAV-----PEQFQIWHVFWYGNIPGGAARFRYFRKRIENTRLA-----CTLHEKSAMSLPRLLSKEAATWLKFDLEL-----ISQLESTISHS-----TFGGQVIAEIVRADQASVSKNQVA
Rts1_IncT  VVLYSITDKASFEDANESPVIKSDRALARWIAVVGVMHDIGKIPIS-----DUDVMDKS-----GHEKHMVAOCLHEWAEKIEREYFIWRSDR-----HERHNTSLTKMTDIPKSLAQLMQEGND-----IYNEALTAGANSFRAVTSRNETGTIFKNIKHKIVAHADSRVSKQDLQR
pCAR1_IncP7  VASITLDGCLTAFADTNEPTARRSMRLRRWYVAGIASGLLDHAGKPLT-----DIRATDFE-----GNQWIVAYOETLHDWSVKNKLTRYFLHWNNSR-----IGNHVQSVLGAQATRI I PPAVQALIEGGD-----IYEAALDAISG-----GSSPDLTKVWADASTKTRDNR
Plasmid1_Rhofe  MAIRSAQSDAGRI FAANEGERIERRQTEAAMRHAALTGITCELEFRPLT-----EMMIFDPK-----GNQWVSVFVAPLTELWAKQGAADRFFVRHKGHD-----RSVANTLSSWAVNVAVNEVSELNNVNSK-----IVETIFGVSSWY-----ITTADNISTMAALINVRVRIYTOQHEI
Plasmid2_Polsp  IALMRAQAAGEKIFVPPESTIEHRHTIGMWRYSAFGLAGLLSGLHPVIG-----QMTIVTVA-----DQTPWKYKVPPLLTHWQCRSADRYPVIWHHEKA-----RVTGAEAGVASAIIVPEIMNLSQITSDIRDLNVAATREEM-----LADNSITGKVLNVI GRUKEVAELQ
Plasmid1_Polsp  -----MEPRWRYICFLAGLLHPIGIPLVR-----MUVSTKG-----GESWPKMHMDITTWAOEAKIDRVVFNWSDSESLEQNKRLGSPPYTASILHKVIGPENGLWLEEGSE-----LITRFLPELVGGS-----ETTSRIAKDVVVMTGWVQVQREEA
chrom_Neigo_  VAALALVASTSQSWPNNAKTEIAKTTAVRYGIMCAALLHDVGTGVTGVPGLFDSAA-----SEKLLMLDPTGSMASAEKQ-----LYRYVEFPDAK-----A-----YSTHAEIAWTFQALVPSVRWQWLATPDE-----LMTLTRNLYSGK-----KDGSPLEQLIKMADTMSVSRDLRS
pNPAP01    AGLTALRDCDGVIFEPSASAQRMELVQRYVAAWCATLA-----GVPLIVDHALLTVN-----DKWFSFVPSSSLWEAEGTGTSGYIIEWKPSK-----NPTPLSGLLILLSSFFVAGQFT-----DFDSSVLQVLSQNSVNPGLTO
Plasmid1_Shesp_  VALFSLRHMASVDIRETKPTDELHGKLRQYAAWVIGLVHDIGKALH-----DMTVQADD-----SVWNQPLENIYDWSGKNQVSRVQVTVNYAD-----HGKHI GLASSMLNTVLTAKAQYLFQTDQ-----LQVAYIETLSGS-----EVNNSLRDSLCKGEARSVHKMDMM
=====

```

Fig. S1 Nonaka *et al.*

370 380 390 400 410 420 430 440 450 460 470 480 490 500 510 520 530 540

R27\_IncH1 LR-DPIMGLRSNDAAARAIGTIKHNFTSININNYKTKPMHIIIVNGE VYLNENAFLDVFLSDFAAHKFNFPQGDG KTVLVESLVQRGVVEPYDDER VVHYFIP-GTYSENEIASIFRNIGKLFEFYNLLKLRMLGLIFDSYKTPDSVPGLFSVNANKDFIY DEQKTVTEYRP

R478\_IncH12 LR-DPIMGLRSNDAAARAISTIKHNFTSININNYNAKPMHIIIVNGE VYLNENAFLDVFLNDFLHKYFNFPQGEA KTVLVESLVQRGVVEPYDDER VVHYFIP-GIYSENEISNIFRNIGKLFEFYNLLKLRMLGLIFDSYKTPDSVPGLFSVNANKDFIY DEQKTVTEYRP

R391\_IncJ QR-ISVDDNALGVVPERYLLDAMRRLASSQWLNVQRDVRVLRKSNSTH LYLWVKSAAKDI IELLAKDKI PGI PRDP DTLADLILIERGLATKSASNE -----RYESLAPEVLIK---DDKPIWLPMLHIVADLLFSSNVPSVRLFSKSEWEATRTQTA EPQSRSSSEHS

SXT QR-ISVDDNALGVVPERYLLDAMRRLASSQWLNVQRDVRVLRKSNSTH LYLWVKSAGKEI IELLAKDKI PGI PRDP DTLADLILIERGLAIKASNE -----RYESLAPEVLIK---DDKPIWLPMLHIVADLLFSSNVPSGVILFNKSEWEATQQTQA EPQSRSSSEHS

pAsa4 NR-LNVDFEFSYGVPERYVFDARLRVKTGKWKVNEPGAKVWHLQCG VFIAWRN-LGDLYDLISHDKI PGI PRDP DTLADLILIERGFVAVNTVQEGKDRAYY-RYWEVLEPMIQ---EAGGSIKILMLRLESNELVFTTEPAVAAGEVVGVDADAVIEL DPDEASDADD

pIPI202\_IncA/C SR-LDVDFEFSYGVPERYVFDARLRVKTGKWKVNEPGAKVWHLQCG VFIAWRK-LGDLYDLISHDKI PGI PRDP DTLADLILIERGFVAVNTVQEGKDRAYY-RYWEVLEPMIQ---EAGGSVKILMLRLESNELVFTTEPAVAAGEVVGVDADAVIEL DPDEASDADD

pAQU1 NR-LDVDFEFSYGVPERYVFDALRRLVKTGKWKVNEPGAKVWHLQCG VFI TWKQGASDIYDLITEDKI PGI PRDP DTLADLILIERGFALKNVLPEKGDVYF-RYWEVILPELQEGEEVTKIKMQLMLRLESNELVFTTEPAVAAGEVVGVDADAVIEL DPDEASDADD

PAGI-2\_C DP-ARAMAAPKHALQRKLLDGLRYLLKEELKLNQPE-ASDGWLTEDA LVLVSKTVSDKLAHLLSQIGDI PANN TAVFNVLQDHGMQLPTDCKAVWRATY-TSNAGWTHSFTLLRLAPALIWE-AGERPAPFAGTVAIDVAVPNDK---SVAQPAVAETPT

c1c DP-ARAMAAPKHALQRKLLDGLRYLLKEELKLNQPE-ASDGWLTEDA LVLVSKTVSDKLAHLLSQIGDI PANN TAVFNVLQDHGMQLPTDCKAVWRATY-TSAGWTHSFTLLRLAPALIWE-PGERPVPFAGTVAIDVAVPNDK---SVAQPAVAETPT

PAGI-3\_SG DP-ARAMAAPKHALQRKLLDGLRYLLKEELKLNQSG-ASDGWLTQDA LVLVSKTVSDKLAHLLSQIGDI PANN TAVFNVLQDHGMQLPTDCKAVWRATY-TSTAGWAHTFTLLRLAPALIWE-GENRPEPFTGTVLIEE---SNDAPAEFS

PAGI-4\_C NP-DRALAAPKQSLQRQLADGLRFLVKDKFKLNQPGGSDGWLTQDA LVLVSKPAADQLRAYLLAQIGEGVPSSN APFFNMLQDQAVIQTNAEDKIWIATYI-DNGAGWRNKFTLLKIAPALIWADPAERPIYSVSGSLVIEEGNASPEKPTTCEIPNDP EQRQAPKAM

pKLC102 NP-DRALAAPKQSLQRQLADGLRFLVKDKFKLNQPGGSDGWLTQDA LVLVSKPAADQLRAYLLAQIGEGVPSSN APFFNMLQDQAVIQTNAEDKIWIATYI-DNGAGWRNKFTLLKIAPALIWADPAERPIYSVSGSLVIEEGNASPEKPTTCEIPNDP EQRQAPKAM

Plasmid2\_Ralme\_pMOL28 -----A INPDRPTG-LETLHKVVRQSIDT LTQFEIKARKAIEFPDSTPV-----TAER

pHG1 -----A INPDRPTG-LETLHKVVRQSIDT LTQFEIKARKAIEFPDSTPV-----TAER

pBVEI02 -----A INPDRPAG-LETLHKVVRQAIEI VTQFELKARRAFAPDTPAPSA-----QALAVDA

pMAQU02 -----A INPTQSPGTGGVESLTHKVVQRQAVT AAEFDRKQRAVFEVPTFAV-----SAIHVAELE

Rts1\_IncT NT-GKKADHTNTIPLYEKLIVSLRKLVDGDKRKNPGAAVVWTDGT TWVVSKATMEAVRIQLINEGHSGLPKNV VTLFGLINDHDCVLVNPDDG VVWYAEINDHGKNWQOKLTFLRFKNEI IWPTSQPDMGDTVTPIDRNG-----NPLEISQVVE

pCAR1\_IncP7 YSGDAVRASQTGVPIARIIVDAMRLLIKKEEWPKNQAGSLWVTGEG VFIWVGTAVTPIISIVKESGINVPHSAD SLADIMVNHGCLVLSNDDG VWRLAPHILNDKISRQNEKPKNALSCILKVDPVVLE TDDVMPNPTSCRIKLDGWKEFTGAGLTH-----KQSPSRPYV

Plasmid1\_Rhofe GS-NNGGNGATGVPPVRLVSDAMLRLLSDGTWIKINTPGGRVWVATDG IYIVVMQGAEEIVSMVLQGVGAVIPRSP DTLIGSLVEHGLAERANSDG VYLWVTPHLLKQPKPALRCMLVNPDIKLFPTPIEFPVSIGLGKQKQKVDIAPNDTAGAANA-----LSEHQDLFG

Plasmid2\_Polsp AP-ATYKGLTSGSQLEPYFMDAMRTLLRTGQVQVNTKSGRCHFGADG FVAVWRMGSQIEILHGLHTEKJAGVPTAK ETLAEMMGRAGIISISAPDGS NPHLVRV-SVGSAGMPAVRQLQTEPLALGHLEVPKVAOTLVRNSAKP-----APSVAIPLTK

Plasmid1\_Polsp HP-ARGRLTIGTQFEIHLNALRELI EEREKWLNDNPGCLFEGSDG LVAVWRGLEDVTSTIFAKRQLKGMPLSS VTLAEMLQGSQVVIKGTDTGV VHDIVV-----GAEKVVVSAMREKIEPAVLLG-----HLDFQVPS

chrom\_Neigo\_RRPQAYGRLTVGHILTPLYVMSRSLVNDGKWKPNGLPIDVDSGT VYIWPDAGEEIVROGAREGRDGWPSA ATLAELLKQDGVFETS YGNDGMTEVVDKEGNVLQSYKLLKPTTVIETYEASDYQRAAPKTLSGVLDLDR-----DPLAKAEAKV

pPNAP01 GSRQRFSTAKRKFPIETIMETLKEMLSDRGVHFS IATTAGDLFRKGD VYILMSKNVPDYIRQLRKNQHPAAGSFPADN QRIPTDLFEYRAVIPPENDPHRAINHIEVEFTFMDGKVRNIFSVLCTFNAKLTYPDQVYTFELNGLSEVSAKKEIPDVVVSDEKMTQIQGAEDN

Plasmid1\_Shesp SS-----GESSLSKLVRAQEKVKATEKLR-----ISRVFVPGAQVNTVASVQA-----

QW----DRLTGARKMPLAFAFKLQMRMRGWVNEEKADICWLGAE VYVSYPASFNKVMSSLKEGDFNVPMQVG-----KMLEMLVERQLFEPLFEDYSVSGHLHPVTPNPEWTAGIKVVKPKWAGIVVGEDI PQSGHKGKLSLIRDDSLIHYADTGLITLTD-----REPPDQTPAN

550 560 570 580 590 600 610 620 630 640 650 660 670 680 690 700 710 720

R27\_IncH1 VPGRESVTRVTDVNDAIENTPQYGLQLVNGPDAASN-----NII SSENTESITDSLEESGADI SNEIFETQVVTIATDAETVNADEPEQVEEHDERSQHLVLEQHEMILLSAPLPHHAVINIDSVVYLDLDAATALI PGI DEAAFCNGFPQLTYRDSGLDGMIVRDNVNLRLIQL

R478\_IncH12 VPGRDVITKITDVTETAVLKVNDLGRSSAS-IDVD-----IHSKNEGSSDDEKKAESNEIDNDTQIVKSEGEAAFPV IPI DEESE-DESAKDTESHVLVNLQHEMILLSAPLSNDYIVCVDAVYPLNIDT MALLPGLDEKAESEEPYFQLTFREGSLDGMIVRDI DDLRLVLQ

R391\_IncJ -----DLPEASSI EHRKSTESFSTNSSEQDDELRLASDVNNPQATEN-----APGDGCEKPNNSYDGAISNNVNQVDTAALN-----

SXT -----DLPEASSI ELSNSAESFSTNSSDQDELRLSSDVNHLQATEN-----APGDECEKPNNSYDGAISNNVNQHDAAALN-----

pAsa4 ESAGSMESSLASAEQEMNALAGLFGFDAMEILGGTASDNDATQPAVVDVTPPAKPAKAGGGRGKQAK-----KTPAAPAEQOPEP-----SQEIAKSTPPLAVENPLQAIMDVGGGLDGLDPPFDPAVAGTMSDEPSQALAPEPKQ-----DVANPDNDP-TPNLGLMNVQF

pIPI202\_IncA/C EGEAALNDMLLAAEQEAKALAGLFGFDAMEMLKSTS-----DAVEEKPEQKDGAGTPESSKPDAGKKGKPSQKPKSDETKQHPKPEAK-EDLSQPI DI AKNAPLANNPQLAKLDVGGGLDGLDPPFDPAFNAS-----ATTSTSDATNSEIP-----DVAMPKQEQEPKPLGNVQEQ

pAQU1 -----DENSDSLTATPEPIGSLD-DGF-----EIPDFMAAPPSTDSQSEPKGKSTDT-----KTSKNDKADAPKEP-----SAQEIAQTAAPLALDDPLKGLKDAGALGVCDPPFDAGLNTEPDTTQKDKAETPNVPTQESEEDTSLPGIDNIRSGKQRQPKAS

PAGI-2\_C -----

c1c -----

PAGI-3\_SG -----

PAGI-4\_C -----

pKLC102 -----

Plasmid2\_Ralme\_pMOL28 -----

pHG1 -----

pBVEI02 -----

pMAQU02 -----

Rts1\_IncT -----EKPPERVLNVDPPDI LKGGSLPPTDLPDGTVVKRGVIEQKNI VDHMLRMLLSPENAAIKSRNENAKAKAESQDVEASPKPAETSVAP-----

pCAR1\_IncP7 -----ADLTGDSGGDTDADSGPTPKPE SASSKARKKKAAPRQAAPVPTTASSGVLSKQAQNPVEDAPVNVDSESAADETAIVSSQPEEALDAE-----

Plasmid1\_Rhofe -----

Plasmid2\_Polsp -----

Plasmid1\_Polsp -----

chrom\_Neigo\_pPNAP01 -----VTMTKDKMDFLSIQPVTAEQPLPEKNQVTEANSAFDNSMNTAA PAENKSSESEKAKEPDGTIDNLIENFNLEADSEQTESTKSEAEATAENAVN-----

Plasmid1\_Shesp -----TAAPTQAPAPATPTPAVAVPQQNGSQTNQSKAQTKKPKKQASARASTNTPAPAPAPATTPSEPAPEKSQVETQVPEQSNTRAPADTKGIVFKMNDTPIVSEPAEAAVIEPTEIAQEMP-----

Fig. S1 (continued) Nonaka *et al.*

730 740 750 760 770 780 790 800 810 820 830 840 850 860 870 880 890 900

```

R27_IncH1_ GDNCGAGVSTSEPRNTSSLKSLFDTS-----MYQLPDIPEAPSVNEAASPPQTPLELPQPRLNVAEAEASSVAEQTNHSE--PDSVIATEYEQGHILEETLDS---DGEAYSDLTLASDSIAEY
R478_IncH12_ GDNCGAGFQLYHEPRRPTTLKSLFNST-----MYQALVINDESSVENAAPRPKQTLLEPPPVRNVAEHSQDVEYHGTDSASATGPKLTEAVEYEHQHLFEKEDDEEHEIDYDFQSLSVSRPVGSC
R391_IncC_ SXT-----LPELAWLPEASSALVMGEQLLIRYPDAVRPWCAPRKLKLAELSQLDWLELDFANPTRKARVTTNDNGVQEQGLLKLKVS
pAsa4 PNFMNDESTGVDGMDLPPAWAIEEIP----SFHAYEAGEVGGQGNQVSEELAG-----ADAPDAKCELLTLMATFGAEPILERAIPVLEGGKATLGEVLCMKGQAVILYPEGARALGAPSEVLTALFHAQAVIPEFVMSGRKRVDFNGVKAIVLTEQLSSAF
pIPI202_IncA/C_ NSLQGDDEF--MFGGSDPEPPSWAIEPLP-----MLTDAP-EQPTHTPEMPHTDNVN-----QHEKDAKTLVLEMLSGYGEASALLLEQAIMPVLEGGKATLGEVLCMKGQAVILYPEGARALGAPSEVLTALFHAQAVIPEFVMPGRKRVDFNGVKAIVLTEQLSSADAV
pAQU1 ANTAASLSPNEFFPGEPSAIFDAPMPMPEDMFAPIDAVPLDAYDYSHEMEEREFEVTEHPHQDAETYSFSQDQKSSDVVDRGHLENVLSGYGAESILKEAIIPLVLDGHKTLGEVLCMKGQAVILYPEGARALGAPAEVLTALFHAQAVIPEFVMPGRKRVDFNGVKAIVLTEQLSSADSVI
PAGI-2_C_ c1c-----GGQESPPEWEGGSAADPIIAPLAEAMPDVMEIDLTMVGMGDSATQODESTIPELSELSATREPAAPPSSIVASSPSSAPAPATPA
PAGI-3_SG_ c1c-----GGQESPPEWEGGSAADPIIAPLAEAMPDVMEIDLTMVGMGDSATQODESTIPELSELSATREPAAPPSSIVASSPSSAPAPATPA
PAGI-4_C_ pKLC102-----DSCDSSPAASTTTLTSS-----TEPADGVDLALLSAPDKGPPPE-----TVICPLSTSSVSEPTTFAQESDAMQPPMPPSPT
Plasmid2_Ralme_ pMOL28-----LRQPATPIAKPSNDIQAIKHSFTDDQEETDDLALLGNINSPPLELDTSHDPAVSPANTRGEEMLQPLGTKEHIDDAPEA
pHG1-----LRQPTPSVAKPSNEMRAIKHSAEQEETDDLALLGNINSPPLELDTSHDPAVSPANTRGEEMLQPLGTKEHIDDAPEA
pBVEI02-----EKAVNPSLAQADAPVPAPPPATSTQHADGKGNVSPAESAGLGSQAQVESPDATASDASAARNVVQLDGARSRLKESLDDPF
pMAQU02-----EKAVNPSLAQADAPVPAPPPATSTQHADGKGNVSPAESAGLGSQAQVESPDATASDASAARNVVQLDGARSRLKESLDDPF
Rts1_IncT_ pCARI_IncP7-----TGASTPPAQARTETAPEVETGATATPEVEEQPETTEADPSSPAGLHQAGSDASQHRASR--NAVQLDGARSRLKAPAEEDPF
Plasmid1_Rhofe_ pCARI_IncP7-----KVESAPPAAPAPAPAEHVITADSSAAVAAGGGAADPEMPLASDSEGARPREVPAVLEQGAPKGDEROMALEHPLAAAV
Plasmid1_Polsp_ pCARI_IncP7-----DDPDPKAGEGHLHQHRETTHNNEYNQTKPKVASGPPVTSKITTAHKEKGAEPPEEAKEQSQVRAQSGKAHGLTSEEPVTEH
chrom_Neigo_ pCARI_IncP7-----AKGKAEALSDDKRSQNKKSEKKAASVPAEKAVPEQTEQDELFGIDNRYNDYFHVDTDEENQETDYLMEQYNNQTCSEHPLAL
pPNAF01-----EEEEAPQEPASLEEMLFIISPHSPADPHQETLSAAEAEISSDLSADPCAGPQGAQELPRQEKIQLSINSIMGGKRT
Plasmid1_Shesp_ pCARI_IncP7-----DIVSVAPALAKEVQELIALLAPKSDLKAKVLESVDQETGEIAPVVASKPAAPPEPKTSAAAPASDVDPKPAVAAKAPSA
pPNAF01-----YKAMVEAQEQLTLAARTVDVAVNTFRAGAAAEQPSALVADAPTQVQVTTSAASANKESSAHKVPPVLUVSTDS
Plasmid1_Shesp_ pCARI_IncP7-----EKKAKPAQANLEVDTPAVSTSPANATVDPETGELIASTEVRNDVSSTDGADLSADSAPEVPAVEVATAPIQPPLALDAPL
pPNAF01-----LVQENIRVEVKTETVDKPRAEVETEDKAPKTIKSGTKASRKLGLFADNRKRLGKTAEPDAQIKTTVTVHQIDISEAVTSLP
Plasmid1_Shesp_ pCARI_IncP7-----LQTVPASTTTESAVIYNTPKAKSISSNENQKILQVVTLNVASEQRTNQININSLTDSKLIKLENDQKLENKSVGPIPKVK
pPNAF01-----VEVSKEKTCIELLIRYLLTANNLTHRAKLDGVDVTLNLSLFEEDQMRGLGFAEAVLKDLMDKLLELDPKPAKIVHVNNKQVYQKLAIVLAK

```

910 920 930 940 950 960 970 980 990 1000 1010 1020 1030 1040 1050 1060 1070 1080

```

R27_IncH1_ PATDPQSSDFAQLPRETALSVAPEGDLDYSEGAIKPPAPDATGKEIILTSPEPAEDVRETVAAEKASHLSPALARLFAVS-----THAEKKHEQTQEPSVKEVKNPSTSSITVKAPISIEPP-----GAEKEAVEEFTLLNDGEMVTHELYVE
R478_IncH12_ ATSSSVNHKELLSESELPELNREQNADPQGTNERSMDVSVGQENSEPDTEGNCPPAEVVSQTEATATSVMASEPALPVLEESNGEHAPDADKAG---HHLSPALARLFAPTAPVEKQKPNRKNRSDDKAEVQKASPVSGHN--LNSVFASTESQNGEFSLISEGVDVTHELFEVE
R391_IncC_ ISKR-----LIALIDISKQGTPEAAAIQNEEALQPRSRTKTNN-----AQAKEPATRAERKQKPIAPN-----AKSSTDPKVYQRQOM
SXT-----LTSLIDLPKQDAEFAAAIQNEASRPSRETETN-----AQAKEPAKRAERKQKPIAPN-----ANSTDPKVYQRQOM
pAsa4 IAAIKQAEESLGGYQDAFELVASPEVKTQSKNKRQQRKTSRSESGEDSHAASPERAQVEEKRVADAQQLIDVSVPPSPVVDTPPPKVVVPRKESRGKEKVDKPIQAPATTKTPEGTQNLARLPPREQPKPEQSQ--QKQARVIDVG-----NIALPL-----GPDLEPELSPRSVKEET
pIPI202_IncA/C_ IAAIKQAEASMGYQDAFELVSPGLDASKNKAPKQSRKKAQDQKPEVNAQ---KASPEQK-----AKGKDSQPKQKPKKVDVTSVPE-----EQQRKPVQ-----EKQVWARLPKREAQVVAPE--PKVEREKLEK-----HVVREEREDPEVREPEFSPKAINPKPD
pAQU1 KAAIEQAQKDF---DPIREVSAINDKQSGKKAEKAKHSEKKVKSKQTNQSTPKPKKPMAMDISALLPGEQTGRRSSENKRIAQTAQKKGTAAK---TQTEQHNESENSASNEEKQNVSRLLPKRQKPKTTVNVKPKKTRPVSLDFDSDLELPMTKVVGQIDLEDEEKKKQKAKE
PAGI-2_C_ ATTVQPS-----GEHFMAWLKQGIASRRLIINDAKALVHTVSD-----SATAQPS-----GEHFMAWLKQGIASRRLIINDAKALVHTVSD-----TAYLVSQGVFQRY
c1c-----ENGNAS-----GEHFMAWLKQGIASRRLIINDAKALVHTVSD-----TAYLVSQGVFQRY
PAGI-3_SG_ IEDVFMPRSRSTDLGQGFVDMWKSIGIARRLFIINDTKALVHTVDG-----TAMLVTPGIFKRY
PAGI-4_C_ IEDVFMPRSRSTDLGQGFVDMWKSIGIARRLFIINDTKALVHTVDG-----TAMLVTPGIFKRY
pKLC102_ IEDVFMPRSRSTDLGQGFVDMWKSIGIARRLFIINDTKALVHTVDG-----TAMLVTPGIFKRY
Plasmid2_Ralme_ K-----ALAGSSN-----LMREFFKLAQDV
pMOL28_ K-----ALAGSSN-----LMREFFKLAQDV
pHG1_ K-----AIAGTSM-----LMREFFKLSQDA
pBVEI02_ NPPEIRR-----EPGAAPATPAGERFDEILKGAPR-----MISDFMALARQDV
pMAQU02_ WKTAKREVQEDILRENDFLAWLKGIAARRQIRVNEKAPVHILDG-----HVALVTPEIFNLFI
Rts1_IncT_ QERMARAAIQQYEQDERNINQDGAPESSWEKARAKIRQAQDIDGHAVTSDTYPHTESADVSFAFIDDDHHSFAMFNDGPDCAKQILKRLVKERAG---ELFADNYHLFVHKQNEQDEHDYTVLVNAGWVWPKFLEPMDNFQLYKSKPGFLRRRGLMDEIDY
pCARI_IncP7_ PKTTPPAESKKQKDGVEGRVAEVEPCASSILPLADVVSKLTAHECVLLEQQPDLAQKLIATQ-----DPENAALARNKVFVRLGKSSFLAEDIHPLVHAGWLQDITVEGPAALTRTLQSGREGMLTADY
Plasmid1_Rhofe_ KPGIP-----TVEDVDDLQVQETFD-----DMLLELGAHCREV
Plasmid1_Polsp_ VEVGGDS-----SPHGKRRVVDWLKRLKMKKDD-----DTANALGMVLEQSL
Plasmid1_Polsp_ PGCSG-----RIKEAAEVKFSDLVPEIRKEIKT-----TLTIELLGVVIKAW
chrom_Neigo_ ESESAQNGMRELERLRLEPTSSPRPVQVMDSEGLDLSASGVKMAEAEIVS-----ERNLKKQSETESTEIVEDSVKAKHMEARDRGMQFLRWLADLGDGSIAVNRSQATVHIEQGM
pPNAF01_ T-----FWLRLISDEA
Plasmid1_Shesp_ PVGDMLTELQAKADERKARKQKNKALTTEVITSPNSLPTQESSIKVDVIGPKTEVPEQELSPLMPNEVPPSSCHSLMAEVEQDLSLMTDELPE-----PLSEYAREMSLATPENELPWFPTPEEQSMLTDMETVTVVAEAAIETAVEPATTASFTFAEQV

```

Fig. S1 (continued) Nonaka *et al.*

1090 1100 1110 1120 1130 1140 1150 1160 1170 1180

```

R27_IncH1_ IATMLHQILTKLSGSFKR--KRKNRFMVLTQNTFYITQSCIEKYG---TQLNAPDLFNQLPQYQVTSGAVVNTKCIAFNIPTLVAASDRAKVDIELIINKLKEVGNL
R478_IncH12_ IALVLVHQILSKMEVAFKR--KRKNRFMVSTPNTLYITQSCVEKFG---SQLEAQDLFNKL P QYLVNSGAVI NTKCHAFNMPTLLAASDRAKVDIERIINNLEAGNL
R391_IncJ_ VNEVFKDLPILLTDGDYDPD--VDHSADGIR-----VVIQTTLRQVANAHGIPAGQLLRGISASDECQ--FDEGETVLFTHAKR-----
SXT VSFVKDLPILLTDGDYDPD--VDHSADGIR-----VVIQTTLRQVANAHGIPAGQLLRGISASDQCQ--FDEGETVLFTHAKR-----
pAsa4 VDEALYLPP--KMTPEKA--IQMLKEMIKNRSGRWIVSAVLEEEG---FLTTSDKAFEVIAGEYTGISKHVLGGTLRRAQRRPLLKQRQKLYLEVVDKS-----
pIP1202_IncA/C_ INAEDFLPS--GVTPQKA--LQMLKDMIQKRSGRWIVTPVLEEDG---CLVTSDKAFDMIAGENIGISKHILCGMLSRQRRPLLKQRQKLYLEVNET-----
pAQU1 ISDEDFLPPQSDIDAEEA--IRLLKEMIKNQKGRWIVGPKIKEDG---CLVTSDKALEKVGTGECTNLSKSMRLRALLASGQRRPRMTIRQGNLRLEVE-----
PAGI-2_C_ AQEHPQLAAIARQEKLEP--WQWAQKRFEKLAARHRQASGLNIWT---CHVSGPRKSRQLHGYYLLTQPGALFERVPPNNPYLCLFNEEAGREVS LAAK-----
clc AREHPQVGM LAKQESQDD--WQWVQKRFEKLLQLHRH HINGLNVWA---CSVTGSRKSRQLHGYYLLRDPPLPFGKVPNNPYLSILQSI-----
PAGI-3_SG_ AQEHPQTAAALAKQDQVAD--WQWVQKRFEKLQMHRRQDNGLNIWT---CEVTGPRKSRRLHGYYLVSDPRHIFEEVPLNNPYLQLT-----
PAGI-4_C_ VQEHPEVEKLAQAKETAG--WKLVRQAFQKQGLHRHTSKNLNIWT---IKVSGPRKTKELKAYLLQDPKLIFFPVQPLDNPSLTVITDAEGGVE-----
pKLC102 VQEHPELEKLAQAKETT G--WKLVRQAFQKQGLHRHTSKNLNIWT---IKVSGPRKTKELKAYLLQDPKLIFFPVQPLDNPSLTVITDAEGDVE-----
Plasmid2_Ralme_ ASGKAKVARIDGKVSISK--RSLGNFGLASDTLVEHLRKGKHYLYK---VDGQNI LLVDEVGRLIAPETAS-----
pMOL28 ASGKAKVARIDGKVSISK--RSLGNFGLASDTLVEHLRKGKHYLYK---VDGQNI LLVDEVGRLIAPETAS-----
pHG1 AAGKTKVTRVEGKVAISK--RSLGNYGIASETLIENLRKFKHYLYK---IVGQDI LLVNEVGDLI LPASQABEA-----
pBVIE02 AGGKAKVRWAEKGLVVPK--RTIGGYGVASDTLIEHMRRRNLLL AN---DPTEVTLAPRIGELILERGA-----
pMAQU02 LDKNSLKKRRLYEK RAGDKRVTYTVLQRELEVLDI HQFGTDGQNI V T---VSVEGQRSKSELKVYLLNRACFESLRAFAANPAIKIHL-----
Rts1_IncT_ LSGGTLYKSIYPVDPNKS--YCTDSALYRAIASGILKQTFDNKD---VIAISGSAIRNMAKSLRIDTVTVRFLICYNFDSVSKRGSEHVLVDENIKPYMVS SHE--
pCAR1_IncP7_ SVIYCKLAELDWAIPHL SRLREADIPSELEQAVKSLIEKAVLEEIGSGSEVLSLTTYMLTNVAEQFGITSTSIENAVFCFRDAVKVAKRRKI FVRPLYEELPKK-----
Plasmid1_Rhofe_ AAWRDLWNRGQSSQEF LRTTEGLAVSYAVVNGSAIQLSKIMEALKG---AGYIEISNLNGTQRTLTPIEFPPKKTGLGLVLR TNFARKAGFILE-----
Plasmid2_Polsp_ AYRGDRVKVLDWGVAICVNWLTNTAGYDLADVLNPIERVGV IARN---PQEKGVALVSKVVFSDSPTPRMFAVAVKLDFAAKVGM AIDAKV-----
Plasmid1_Polsp_ RERGEQSTTMRLTDNGAAISIDFLGLTLMRSIPDNANEMASAGLIY---APPDRPGLKVHKVAIPEGSKAKAEIVISRYGCKKGLGL-----
chrom_Neigo_ LLVTPAVFRDYAGGVFNKSDTESLGLTQKGF EALFLHARTKKSSLHRVLT TNGSNRRLFYCYLIPEHNIQHIIQPGSRPQNNTDIKLDES DLLVMEQK-----
pPNAP01 MRLAFKFLPDQEMVDITG---AQLRFQGVVAKEMFELHSSSGFVHS---KVGNTLVRLNKELTAVVQNEFKNLGVTHA-----
Plasmid1_Shesp_ STLSQLKVATGNKSPKEKSKYPPELQVFIGWAMARAGKSGIDL RFG---VIRIQSFALTTYEQEVGLAKKEATSLKRTAGDNAS IATDSNQVAWVMVFETV GIEHE-----

```

Fig. S1 (continued) Nonaka *et al.*

Table S1. List of MOB<sub>H</sub> plasmids used for phylogenetic analysis of relaxase (TraI) <sup>a</sup>

| Name of plasmid or Mobile element (ME) | Accession number of plasmid or ME | Bacterial source                                            | Relaxase name                     | Accession no of relaxase     | Size of relaxase (aa) | MOB <sub>H</sub> Group | Experimental evidence for transfer | Reference              |
|----------------------------------------|-----------------------------------|-------------------------------------------------------------|-----------------------------------|------------------------------|-----------------------|------------------------|------------------------------------|------------------------|
| R478                                   | <a href="#">BX664015</a>          | <i>Serratia marcescens</i>                                  | hypothetical protein SMR0211 TraI | <a href="#">NP_941280</a>    | 1050                  | H11                    | YES                                | Hedges et al., 1975    |
| R27                                    | <a href="#">AF250878</a>          | <i>Salmonella typhi</i>                                     | TraI                              | <a href="#">NP_058333</a>    | 1011                  | H11                    | YES                                | Maher & Taylor, 1993   |
| Plasmid 1                              | <a href="#">CP000470</a>          | <i>Shewanella</i> sp. ANA-3                                 | Relaxase                          | <a href="#">YP_863780</a>    | 941                   | H11                    |                                    |                        |
| Rts1                                   | <a href="#">AP004237</a>          | <i>Proteus vulgaris</i>                                     | TraI                              | <a href="#">NP_640161</a>    | 892                   | H12                    | YES                                | Terawaki, et al., 1967 |
| pCAR1                                  | <a href="#">AB088420</a>          | <i>Pseudomonas resinovorans</i>                             | TraI                              | <a href="#">NP_758664</a>    | 900                   | H12                    | YES                                | Shintani et al., 2006  |
| SXT                                    | <a href="#">DQ180350</a>          | <i>Vibrio cholerae</i>                                      | TraI                              | <a href="#">ABA87024</a>     | 716                   | H12                    | YES                                | Waldor et al., 1996    |
| R391                                   | <a href="#">AY090559</a>          | <i>Providencia rettgeri</i>                                 | TraI                              | <a href="#">AAM08003</a>     | 716                   | H12                    | YES                                | Coetzee et al, 1972    |
| pAQU1                                  | AB571865                          | <i>Photobacterium damsela</i> subsp. <i>damsela</i>         | TraI                              |                              | 1025                  | H12                    | YES                                | This study             |
| pIP1202                                | <a href="#">CP000603</a>          | <i>Yersinia pestis</i> biovar Orientalis str. IP275         | TraI                              | <a href="#">YP_001102157</a> | 992                   | H12                    | YES                                | Welch et al., 2007     |
| pAsa4                                  | <a href="#">CP000645</a>          | <i>Aeromonas salmonicida</i> subsp. <i>salmonicida</i> A449 | Relaxase                          | <a href="#">YP_001144215</a> | 1006                  | H12                    |                                    |                        |
| clc genomic island                     | <a href="#">AJ617740</a>          | <i>Pseudomonas putida</i>                                   | hypothetical protein              | <a href="#">CAE92900</a>     | 615                   | H2                     | YES                                | Mokross et al., 1990   |
| PAGI-2(C)                              | <a href="#">AF440523</a>          | <i>Pseudomonas aeruginosa</i> strain C                      | conserved hypothetical protein    | <a href="#">AAN62129</a>     | 630                   | H2                     |                                    |                        |
| PAGI-3(SG)                             | <a href="#">AF440524</a>          | <i>Pseudomonas aeruginosa</i> strain SG17M                  | conserved hypothetical protein    | <a href="#">AAN62266</a>     | 600                   | H2                     |                                    |                        |
| pKLC102                                | <a href="#">AY257538</a>          | <i>Pseudomonas aeruginosa</i>                               | TraI                              | <a href="#">AAP22591</a>     | 639                   | H2                     | YES                                | Qiu et al., 2006       |
| PAGI-4(C)                              | <a href="#">AY258138</a>          | <i>Pseudomonas aeruginosa</i> strain C                      | conserved hypothetical protein    | <a href="#">AAP94681</a>     | 608                   | H2                     |                                    |                        |
| pMAQU02                                | <a href="#">CP000516</a>          | <i>Marinobacter aquaeolei</i> VT8                           | Relaxase                          | <a href="#">YP_957144</a>    | 624                   | H2                     |                                    |                        |
| Chromosome                             | <a href="#">AY803022</a>          | <i>Neisseria gonorrhoeae</i>                                | TraI                              | <a href="#">AAW83058</a>     | 850                   | H2                     |                                    |                        |
| Plasmid 1                              | <a href="#">CP000317</a>          | <i>Polaromonas</i> sp. JS666                                | hypothetical protein              | <a href="#">YP_551982</a>    | 493                   | H3                     |                                    |                        |
| Plasmid 1                              | <a href="#">CP000268</a>          | <i>Rhodospirillum rubrum</i> T118                           | Relaxase                          | <a href="#">YP_515952</a>    | 642                   | H3                     |                                    |                        |

|           |                           |                                          |                      |                              |     |    |     |                        |
|-----------|---------------------------|------------------------------------------|----------------------|------------------------------|-----|----|-----|------------------------|
| Plasmid 2 | <a href="#">CP000318</a>  | <i>Polaromonas</i> sp. JS666             | hypothetical protein | <a href="#">YP_552224</a>    | 611 | H3 |     |                        |
| pPNAP01   | <a href="#">CP000530</a>  | <i>Polaromonas naphthalenivorans</i> CJ2 | hypothetical protein | <a href="#">YP_973353</a>    | 408 | H3 |     |                        |
| pBVIE02   | <a href="#">CP000618</a>  | <i>Burkholderia vietnamiensis</i> G4     | hypothetical protein | <a href="#">YP_001109781</a> | 441 | H3 |     |                        |
| pHG1      | <a href="#">AY305378</a>  | <i>Ralstonia eutropha</i> H16            | hypothetical protein | <a href="#">NP_943000</a>    | 418 | H3 | YES | Friedrich et al., 1981 |
| Plasmid 2 | <a href="#">NC_007972</a> | <i>Ralstonia metallidurans</i> CH34      | hypothetical protein | <a href="#">YP_582117</a>    | 413 | H3 |     |                        |
| pMOL28    | <a href="#">X90708</a>    | <i>Ralstonia metallidurans</i> CH34      | TraI                 | <a href="#">YP_161633</a>    | 359 | H3 | YES | Mergeay et al., 1985   |

a This list is referred reference no.15.
